# Supplementary material for: Nitrite-mediated reduction of macrophage NADPH oxidase activity is dependent on xanthine oxidoreductase-derived nitric oxide but independent of S-nitrosation
Source: PubMed Central journal article supplement (PMC5065649; doi:10.1016/j.redox.2016.09.015), 2016-09-28
Supplement: mmc1.pdf [file mmc1.pdf]

**Nitrite-mediated reduction of macrophage NADPH oxidase activity is dependent on xanthine oxidoreductase-derived nitric oxide but independent of S-nitrosation**

Christa Zollbrecht<sup>a,b</sup>, A. Erik G. Persson<sup>b</sup>, Jon O. Lundberg<sup>a</sup>, Eddie Weitzberg<sup>a</sup>,  
Mattias Carlström<sup>a\*</sup>

<sup>a</sup> Department of Physiology and Pharmacology, Karolinska Institutet, Stockholm, Sweden

<sup>b</sup> Department of Medical Cell Biology, Uppsala University, Uppsala, Sweden

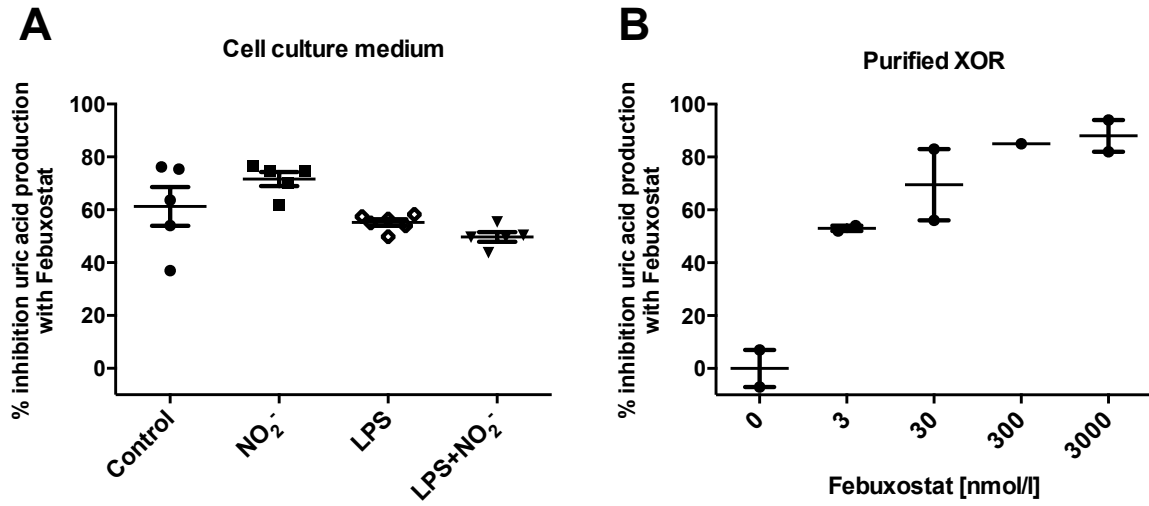

**Supplemental Figure 1: Uric acid produced by XOR is blocked by februxostat.** Culture medium of februxostat treated macrophages showed 50-70 % inhibition of uric acid production (vs. no februxostat) (A). Using purified XOR enzyme, februxostat reduced uric acid production dose-dependently and % inhibition was similar to that observed in cells when using the same concentration of 30 nmol/l (B).
